# Supplementary material
Source: Springer Nature journal article supplement (https://www.springermedizin.de/resource/supplementary/12943_2014_1357_MOESM2_ESM.pdf/9552774)

**A**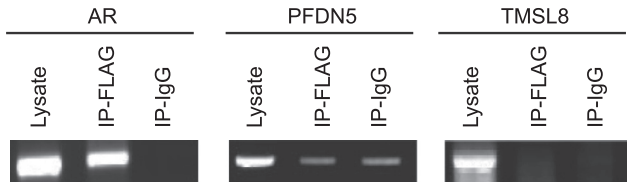**B**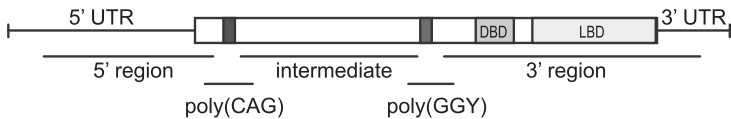**C**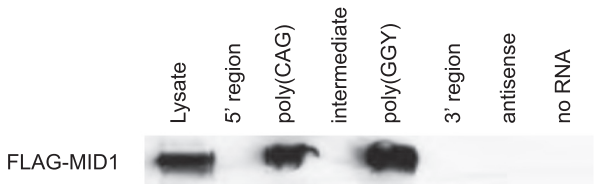

Supplement: MOESM2 [file 9552774]
